# Supplementary material
Source: MDPI journal article supplement (https://www.mdpi.com/2077-1312/11/2/242)
Supplement: s1 [file s1]

# Analytical studies on ciguateric fish in Okinawa, Japan (II): the grouper *Variola albimarginata*

Naomasa Oshiro <sup>1,\*</sup>, Hiroya Nagasawa <sup>1,2</sup>, Mio Nishimura <sup>3,†</sup>, Kyoko Kuniyoshi <sup>1</sup>, Naoki Kobayashi <sup>2</sup>,  
Yoshiko Sugita-Konishi <sup>2,‡</sup>, Tsuyoshi Ikehara <sup>4</sup>, Katsunori Tachihara <sup>5,\*</sup> and Takeshi Yasumoto <sup>6</sup>

## Supplementary Materials

**Table S1.** The specimens of *Variola albimarginata* analyzed in this study and their CTXs levels in the flesh.

| ID     | Collection        |                     | Age <sup>3</sup><br>(years) | SL <sup>4</sup><br>(cm) | BW <sup>5</sup><br>(g) | CF <sup>6</sup> | Sex <sup>7</sup> | CTX <sup>8</sup> level (μg/kg) |             |         |       |
|--------|-------------------|---------------------|-----------------------------|-------------------------|------------------------|-----------------|------------------|--------------------------------|-------------|---------|-------|
|        | Date <sup>1</sup> | Area <sup>2</sup>   |                             |                         |                        |                 |                  | 1B                             | epi-deoxy1B | deoxy1B | total |
| 141640 | 04/Jun/2014       | West-south, Okinawa | 4                           | 25.6                    | 571                    | 3.40            | F                | 0                              | 0           | 0       | 0     |
| 141641 | 06/Jun/2014       | West-south, Okinawa | 7                           | 29.1                    | 773                    | 3.14            | M                | 0                              | 0           | 0       | 0     |
| 141643 | 13/Jun/2014       | West-north, Okinawa | 5                           | 19.5                    | 224                    | 3.02            | F                | 0                              | 0           | 0       | 0     |
| 141645 | 21/Jun/2014       | Ie                  | 5                           | 24.8                    | 466                    | 3.06            | F                | 0                              | 0           | 0       | 0     |
| 141651 | 30/Jun/2014       | West-north, Okinawa | 4                           | 21.8                    | 332                    | 3.20            | F                | 0                              | 0           | 0       | 0     |
| 141652 | NR                | East, Okinawa       | 4                           | 21.8                    | 341                    | 3.29            | M                | 0                              | 0           | 0       | 0     |
| 141653 | NR                | East, Okinawa       | 9                           | 24.4                    | 439                    | 3.02            | M                | 0                              | 0           | 0       | 0.000 |
| 141654 | 01/Jul/2014       | East, Okinawa       | 2                           | 16.5                    | 127                    | 2.83            | F                | 0                              | 0           | 0       | 0     |
| 141655 | 01/Jul/2014       | East, Okinawa       | 2                           | 23.0                    | 377                    | 3.10            | F                | 0.001                          | 0.001       | 0.001   | 0.003 |
| 141658 | 22/Jul/2014       | West-south, Okinawa | 4                           | 28.1                    | 733                    | 3.30            | F                | 0                              | 0           | 0       | 0     |
| 141659 | 23/Jul/2014       | West-north, Okinawa | 6                           | 24.1                    | 422                    | 3.01            | F                | 0                              | 0           | 0       | 0     |
| 141660 | 23/Jul/2014       | West-north, Okinawa | 5                           | 26.9                    | 604                    | 3.10            | M                | 0.012                          | 0.009       | 0.011   | 0.032 |
| 141661 | 23/Jul/2014       | West-north, Okinawa | 5                           | 26.5                    | 553                    | 2.97            | M                | 0                              | 0           | 0       | 0     |
| 141662 | 23/Jul/2014       | West-north, Okinawa | 4                           | 20.4                    | 281                    | 3.31            | F                | 0                              | 0           | 0       | 0     |
| 141664 | 28/Jul/2014       | West-south, Okinawa | 4                           | 25.4                    | 519                    | 3.17            | M                | 0                              | 0           | 0       | 0     |
| 141666 | 30/Jul/2014       | West-north, Okinawa | 15                          | 33.7                    | 1251                   | 3.27            | M                | 0                              | 0           | 0       | 0     |
| 141677 | 30/Jul/2014       | West-north, Okinawa | 7                           | 29.6                    | 745                    | 2.87            | M                | 0.006                          | 0.001       | 0.001   | 0.008 |
| 153024 | 01/Sep/2014       | East, Okinawa       | 4                           | 23.8                    | 440                    | 3.26            | M                | 0                              | 0           | 0       | 0     |
| 153025 | 04/Sep/2014       | Ie                  | 5                           | 25.1                    | 523                    | 3.31            | F                | 0.007                          | 0.001       | 0.001   | 0.009 |
| 153026 | 04/Sep/2014       | Ie                  | 5                           | 25.7                    | 503                    | 2.96            | M                | 0.009                          | 0.001       | 0.001   | 0.011 |
| 153027 | 04/Sep/2014       | Ie                  | 4                           | 24.5                    | 396                    | 2.69            | F                | 0                              | 0           | 0       | 0     |
| 153028 | 04/Sep/2014       | Ie                  | 8                           | 32.0                    | 915                    | 2.79            | M                | 0.009                          | 0.001       | 0.005   | 0.015 |
| 153029 | 04/Sep/2014       | Ie                  | 6                           | 23.7                    | 396                    | 2.97            | F                | 0.005                          | 0.001       | 0.001   | 0.007 |
| 153030 | 04/Sep/2014       | Ie                  | 3                           | 21.8                    | 304                    | 2.93            | F                | 0                              | 0           | 0       | 0     |
| 153031 | 04/Sep/2014       | Ie                  | 5                           | 22.9                    | 360                    | 3.00            | F                | 0                              | 0           | 0       | 0     |
| 153032 | 04/Sep/2014       | Ie                  | 3                           | 19.5                    | 203                    | 2.74            | F                | 0                              | 0           | 0       | 0     |
| 153033 | 04/Sep/2014       | Ie                  | 4                           | 20.3                    | 247                    | 2.95            | F                | 0                              | 0           | 0       | 0     |
| 153034 | 04/Sep/2014       | Ie                  | 4                           | 22.3                    | 346                    | 3.12            | M                | 0                              | 0           | 0       | 0     |
| 153035 | 13/Sep/2014       | Yaeyama             | 4                           | 24.0                    | 384                    | 2.78            | M                | 0                              | 0           | 0       | 0     |
| 153036 | 19/Sep/2014       | East, Okinawa       | 4                           | 25.8                    | 591                    | 3.44            | M                | 0                              | 0           | 0       | 0     |
| 153037 | 19/Sep/2014       | East, Okinawa       | 4                           | 22.7                    | 363                    | 3.10            | M                | 0                              | 0           | 0       | 0     |
| 153038 | 19/Sep/2014       | East, Okinawa       | 4                           | 19.9                    | 242                    | 3.07            | F                | 0                              | 0           | 0       | 0     |
| 153039 | 19/Sep/2014       | East, Okinawa       | 4                           | 22.5                    | 334                    | 2.93            | F                | 0                              | 0           | 0       | 0     |
| 153040 | 28/Oct/2014       | East, Okinawa       | 3                           | 20.0                    | 234                    | 2.93            | F                | 0                              | 0           | 0       | 0     |
| 153041 | 28/Oct/2014       | East, Okinawa       | 5                           | 26.0                    | 457                    | 2.60            | F                | 0                              | 0           | 0       | 0     |
| 153042 | 30/Oct/2014       | Yaeyama             | 6                           | 27.0                    | 568                    | 2.89            | F                | 0.005                          | 0.001       | 0.001   | 0.007 |
| 153043 | 30/Oct/2014       | Yaeyama             | 5                           | 26.3                    | 518                    | 2.85            | M                | 0.001                          | 0.001       | 0.001   | 0.003 |
| 153044 | 30/Oct/2014       | Yaeyama             | 4                           | 26.2                    | 529                    | 2.94            | F                | 0.005                          | 0.001       | 0.001   | 0.007 |
| 153045 | 13/Sep/2014       | Yaeyama             | 1                           | 14.3                    | 95                     | 3.25            | U                | 0                              | 0           | 0       | 0     |
| 153046 | 22/Oct/2014       | West-south, Okinawa | 7                           | 26.6                    | 594                    | 3.16            | M                | 0                              | 0           | 0       | 0     |
| 153047 | 04/Nov/2014       | West-south, Okinawa | 8                           | 28.8                    | 725                    | 3.04            | M                | 0                              | 0           | 0       | 0     |
| 153048 | 04/Nov/2014       | West-south, Okinawa | 3                           | 17.7                    | 162                    | 2.92            | F                | 0                              | 0           | 0       | 0     |
| 153049 | 13/Nov/2014       | West-north, Okinawa | 6                           | 22.1                    | 318                    | 2.95            | F                | 0                              | 0           | 0       | 0     |
| 153050 | 13/Nov/2014       | West-north, Okinawa | 4                           | 18.6                    | 184                    | 2.86            | F                | 0                              | 0           | 0       | 0     |
| 153051 | 13/Nov/2014       | West-north, Okinawa | 3                           | 17.8                    | 169                    | 3.00            | F                | 0                              | 0           | 0       | 0     |
| 153052 | 13/Nov/2014       | West-north, Okinawa | 4                           | 18.0                    | 170                    | 2.91            | F                | 0                              | 0           | 0       | 0     |
| 153053 | 13/Nov/2014       | West-north, Okinawa | 2                           | 15.4                    | 113                    | 3.09            | F                | 0                              | 0           | 0       | 0     |

<sup>1</sup> NR: not recorded, <sup>2</sup> the locations of collection areas are shown in Figure 2, <sup>3</sup> U: unidentified, <sup>4</sup> SL: standard length, <sup>5</sup> BW: body weight, <sup>6</sup> CF: condition factor =  $100 \times \text{BW}/\text{SL}^3$ , <sup>7</sup> B: bisexual, F: female, M: male, U: unidentified, <sup>8</sup> 1B: CTX1B, epi-deoxy1B: 52-epi-54-deoxyCTX1B, deoxy1B: 54-deoxyCTX1B, 0: less than LOD (0.001 μg/kg), 0.001: detected but less than LOQ (0.005 μg/kg).

Table S1. Continued.

| ID     | Collection        |                     | Age <sup>3</sup><br>(years) | SL <sup>4</sup><br>(cm) | BW <sup>5</sup><br>(g) | CF <sup>6</sup> | Sex <sup>7</sup> | CTX <sup>8</sup> level (µg/kg) |                         |         |       |
|--------|-------------------|---------------------|-----------------------------|-------------------------|------------------------|-----------------|------------------|--------------------------------|-------------------------|---------|-------|
|        | Date <sup>1</sup> | Area <sup>2</sup>   |                             |                         |                        |                 |                  | 1B                             | <i>epi</i> -<br>deoxy1B | deoxy1B | total |
| 153065 | 18/May/2015       | West-south, Okinawa | 5                           | 26.1                    | 560                    | 3.15            | U                | 0.088                          | 0.039                   | 0.098   | 0.225 |
| 153066 | 18/May/2015       | West-south, Okinawa | 6                           | 19.8                    | 226                    | 2.91            | U                | 0                              | 0                       | 0       | 0     |
| 153067 | 18/May/2015       | West-south, Okinawa | 4                           | 21.1                    | 281                    | 2.99            | U                | 0                              | 0                       | 0       | 0     |
| 153068 | 18/May/2015       | West-south, Okinawa | 4                           | 18.9                    | 202                    | 2.99            | F                | 0                              | 0                       | 0       | 0     |
| 153069 | 18/May/2015       | West-south, Okinawa | 3                           | 19.4                    | 226                    | 3.10            | U                | 0                              | 0                       | 0       | 0     |
| 153070 | 18/May/2015       | West-south, Okinawa | 2                           | 16.3                    | 132                    | 3.05            | U                | 0                              | 0                       | 0       | 0     |
| 163001 | NR                | Yaeyama             | 2                           | 15.4                    | 94                     | 2.57            | F                | 0                              | 0                       | 0       | 0     |
| 163002 | 29/Jan/2016       | West-south, Okinawa | 3                           | 22.0                    | 310                    | 2.91            | F                | 0                              | 0                       | 0       | 0     |
| 163003 | 30/Jan/2016       | West-south, Okinawa | 3                           | 25.2                    | 401                    | 2.51            | F                | 0                              | 0                       | 0       | 0     |
| 163004 | 30/Jan/2016       | West-north, Okinawa | 3                           | 23.2                    | 348                    | 2.79            | F                | 0                              | 0                       | 0       | 0     |
| 163005 | 30/Jan/2016       | West-north, Okinawa | 3                           | 20.0                    | 219                    | 2.74            | F                | 0                              | 0                       | 0       | 0     |
| 163006 | 30/Jan/2016       | West-north, Okinawa | 3                           | 18.8                    | 173                    | 2.60            | F                | 0                              | 0                       | 0       | 0     |
| 163007 | 30/Jan/2016       | West-north, Okinawa | 2                           | 17.3                    | 133                    | 2.57            | F                | 0                              | 0                       | 0       | 0     |
| 163008 | 12/Feb/2016       | West-south, Okinawa | 4                           | 18.3                    | 178                    | 2.90            | F                | 0                              | 0                       | 0       | 0     |
| 163009 | 12/Feb/2016       | West-south, Okinawa | 2                           | 17.3                    | 170                    | 3.28            | F                | 0                              | 0                       | 0       | 0     |
| 163010 | 12/Feb/2016       | West-south, Okinawa | 4                           | 23.2                    | 404                    | 3.24            | F                | 0                              | 0                       | 0       | 0     |
| 163011 | 12/Feb/2016       | West-south, Okinawa | 2                           | 18.8                    | 236                    | 3.55            | F                | 0                              | 0                       | 0       | 0     |
| 163012 | 12/Feb/2016       | West-south, Okinawa | 5                           | 22.2                    | 333                    | 3.04            | M                | 0                              | 0                       | 0       | 0     |
| 163013 | 12/Feb/2016       | West-south, Okinawa | 4                           | 21.8                    | 299                    | 2.89            | B                | 0                              | 0                       | 0       | 0     |
| 163014 | 12/Feb/2016       | Unknown             | 3                           | 19.3                    | 252                    | 3.51            | F                | 0.011                          | 0.001                   | 0.001   | 0.013 |
| 163033 | 14/Dec/2015       | West-south, Okinawa | 6                           | 24.5                    | 384                    | 2.61            | F                | 0                              | 0                       | 0       | 0     |
| 163034 | 30/Jan/2016       | West-north, Okinawa | 6                           | 28.0                    | 540                    | 2.46            | M                | 0                              | 0                       | 0       | 0     |
| 163035 | 30/Jan/2016       | West-north, Okinawa | 7                           | 28.8                    | 870                    | 3.64            | M                | 0                              | 0                       | 0       | 0     |
| 163036 | 12/Feb/2016       | West-south, Okinawa | 10                          | 29.1                    | 792                    | 3.21            | M                | 0.008                          | 0.001                   | 0.001   | 0.010 |
| 163037 | 12/Feb/2016       | West-south, Okinawa | 5                           | 22.5                    | 364                    | 3.20            | F                | 0                              | 0                       | 0       | 0     |
| 163038 | 12/Feb/2016       | West-south, Okinawa | 8                           | 27.1                    | 632                    | 3.18            | U                | 0                              | 0                       | 0       | 0     |
| 163042 | 18/Mar/2016       | West-north, Okinawa | 8                           | 29.1                    | 879                    | 3.57            | M                | 0.005                          | 0                       | 0.001   | 0.006 |
| 163043 | 18/Mar/2016       | West-north, Okinawa | 11                          | 28.8                    | 798                    | 3.34            | M                | 0.001                          | 0.001                   | 0.001   | 0.003 |
| 163044 | 18/Mar/2016       | West-north, Okinawa | 3                           | 16.8                    | 150                    | 3.16            | F                | 0                              | 0                       | 0       | 0     |
| 163054 | 14/Dec/2015       | West-south, Okinawa | U                           | 30.2                    | 934                    | 3.39            | M                | 0                              | 0                       | 0       | 0     |
| 163055 | 14/Dec/2015       | West-south, Okinawa | 5                           | 23.3                    | 326                    | 2.58            | F                | 0.005                          | 0.001                   | 0.001   | 0.007 |
| 163056 | 30/Jan/2016       | West-north, Okinawa | 6                           | 30.0                    | 710                    | 2.63            | M                | 0                              | 0                       | 0       | 0     |
| 163057 | 30/Jan/2016       | West-north, Okinawa | 10                          | 26.2                    | 440                    | 2.45            | U                | 0                              | 0                       | 0       | 0     |
| 163058 | 30/Jan/2016       | West-north, Okinawa | 4                           | 23.7                    | 334                    | 2.51            | M                | 0                              | 0                       | 0       | 0     |
| 163059 | 12/Feb/2016       | West-south, Okinawa | 9                           | 24.3                    | 421                    | 2.93            | F                | 0                              | 0                       | 0       | 0     |
| 163060 | 12/Feb/2016       | West-south, Okinawa | 7                           | 23.0                    | 422                    | 3.47            | M                | 0                              | 0                       | 0       | 0     |
| 163079 | 26/Apr/2016       | Unknown             | 12                          | 30.0                    | 860                    | 3.19            | M                | 0.005                          | 0.001                   | 0.001   | 0.007 |
| 163080 | 05/Sep/2016       | Miyako              | 5                           | 20.6                    | 286                    | 3.27            | F                | 0                              | 0                       | 0       | 0     |
| 163081 | 05/Sep/2016       | Miyako              | 6                           | 20.7                    | 277                    | 3.12            | F                | 0                              | 0                       | 0       | 0     |
| 163082 | 05/Sep/2016       | Miyako              | 6                           | 22.6                    | 330                    | 2.86            | F                | 0                              | 0                       | 0       | 0     |
| 163083 | 05/Sep/2016       | Miyako              | 3                           | 17.6                    | 154                    | 2.82            | F                | 0                              | 0                       | 0       | 0     |
| 163084 | 05/Sep/2016       | Miyako              | U                           | 18.1                    | 184                    | 3.10            | F                | 0                              | 0                       | 0       | 0     |
| 163085 | 05/Sep/2016       | Miyako              | 12                          | 26.2                    | 589                    | 3.28            | M                | 0.001                          | 0.001                   | 0.001   | 0.003 |
| 163086 | 05/Sep/2016       | Miyako              | 8                           | 25.2                    | 466                    | 2.91            | M                | 0                              | 0                       | 0       | 0     |
| 163087 | 05/Sep/2016       | Miyako              | 6                           | 22.8                    | 388                    | 3.27            | M                | 0                              | 0                       | 0       | 0     |
| 163088 | 05/Sep/2016       | Miyako              | 11                          | 24.1                    | 418                    | 2.99            | M                | 0                              | 0                       | 0       | 0     |
| 163089 | 05/Sep/2016       | Miyako              | 5                           | 21.3                    | 287                    | 2.97            | M                | 0                              | 0                       | 0       | 0     |

<sup>1</sup> NR: not recorded, <sup>2</sup> the locations of collection areas are shown in Figure 2, <sup>3</sup> U: unidentified, <sup>4</sup> SL: standard length, <sup>5</sup> BW: body weight, <sup>6</sup> CF: condition factor =  $100 \times \text{BW}/\text{SL}^3$ , <sup>7</sup> B: bisexual, F: female, M: male, U: unidentified, <sup>8</sup> 1B: CTX1B, *epi*-deoxy1B: 52-*epi*-54-deoxyCTX1B, deoxy1B: 54-deoxyCTX1B, 0: less than LOD (0.001 µg/kg), 0.001: detected but less than LOQ (0.005 µg/kg).

Table S1. Continued.

| ID     | Collection        |                     | Age <sup>3</sup><br>(years) | SL <sup>4</sup><br>(cm) | BW <sup>5</sup><br>(g) | CF <sup>6</sup> | Sex <sup>7</sup> | CTX <sup>8</sup> level (µg/kg) |                         |         |       |
|--------|-------------------|---------------------|-----------------------------|-------------------------|------------------------|-----------------|------------------|--------------------------------|-------------------------|---------|-------|
|        | Date <sup>1</sup> | Area <sup>2</sup>   |                             |                         |                        |                 |                  | 1B                             | <i>epi</i> -<br>deoxy1B | deoxy1B | total |
| 163090 | 05/Sep/2016       | Miyako              | 4                           | 21.4                    | 303                    | 3.09            | B                | 0                              | 0                       | 0       | 0     |
| 163091 | 05/Sep/2016       | Miyako              | 5                           | 21.5                    | 304                    | 3.06            | F                | 0                              | 0                       | 0       | 0     |
| 163092 | 05/Sep/2016       | Miyako              | 5                           | 18.8                    | 216                    | 3.25            | F                | 0                              | 0                       | 0       | 0     |
| 163093 | 05/Sep/2016       | Miyako              | 4                           | 19.3                    | 206                    | 2.87            | F                | 0                              | 0                       | 0       | 0     |
| 163094 | 05/Sep/2016       | Miyako              | 5                           | 17.1                    | 151                    | 3.02            | F                | 0                              | 0                       | 0       | 0     |
| 163133 | 18/Mar/2016       | West-north, Okinawa | 5                           | 27.1                    | 642                    | 3.23            | M                | 0                              | 0                       | 0       | 0     |
| 163134 | 18/Mar/2016       | West-north, Okinawa | 6                           | 26.5                    | 614                    | 3.30            | M                | 0                              | 0                       | 0       | 0     |
| 163135 | 18/Mar/2016       | West-north, Okinawa | 5                           | 25.3                    | 522                    | 3.22            | M                | 0                              | 0                       | 0       | 0     |
| 163136 | 18/Mar/2016       | West-north, Okinawa | 7                           | 23.2                    | 412                    | 3.30            | F                | 0                              | 0                       | 0       | 0     |
| 163137 | 18/Mar/2016       | West-north, Okinawa | 6                           | 22.2                    | 341                    | 3.12            | F                | 0                              | 0                       | 0       | 0     |
| 163138 | 06/May/2016       | Unknown             | 3                           | 20.5                    | 300                    | 3.48            | F                | 0                              | 0                       | 0       | 0     |
| 163139 | 04/Jul/2016       | Unknown             | 12                          | 26.6                    | 575                    | 3.06            | M                | 0.023                          | 0.031                   | 0.032   | 0.086 |
| 163140 | 25/Jul/2016       | Yaeyama             | 7                           | 26.1                    | 566                    | 3.18            | M                | 0.008                          | 0.010                   | 0.012   | 0.030 |
| 163141 | 25/Jul/2016       | Yaeyama             | 10                          | 28.0                    | 640                    | 2.92            | M                | 0.001                          | 0.001                   | 0.001   | 0.003 |
| 163142 | 25/Jul/2016       | Yaeyama             | 7                           | 28.6                    | 658                    | 2.81            | M                | 0.001                          | 0.001                   | 0.001   | 0.003 |
| 163143 | 25/Jul/2016       | Yaeyama             | 9                           | 28.8                    | 760                    | 3.18            | M                | 0.010                          | 0.010                   | 0.009   | 0.029 |
| 163144 | 25/Jul/2016       | Yaeyama             | 10                          | 25.0                    | 500                    | 3.20            | F                | 0.001                          | 0.001                   | 0.001   | 0.003 |
| 163145 | 05/Sep/2016       | Miyako              | 10                          | 26.8                    | 538                    | 2.79            | M                | 0                              | 0                       | 0       | 0     |
| 163146 | 05/Sep/2016       | Miyako              | 8                           | 24.6                    | 454                    | 3.05            | F                | 0.006                          | 0.006                   | 0.008   | 0.020 |
| 163147 | 05/Sep/2016       | Miyako              | 14                          | 28.4                    | 720                    | 3.14            | M                | 0.013                          | 0.018                   | 0.014   | 0.045 |
| 163148 | 05/Sep/2016       | Miyako              | 6                           | 22.3                    | 366                    | 3.30            | F                | 0                              | 0                       | 0       | 0     |
| 163149 | 05/Sep/2016       | Miyako              | 7                           | 23.9                    | 419                    | 3.07            | F                | 0.001                          | 0.001                   | 0.006   | 0.008 |
| 163150 | 05/Sep/2016       | Miyako              | 10                          | 23.2                    | 359                    | 2.87            | F                | 0                              | 0                       | 0       | 0     |
| 163151 | 05/Sep/2016       | Miyako              | 3                           | 19.0                    | 210                    | 3.06            | F                | 0                              | 0                       | 0       | 0     |
| 163152 | 05/Sep/2016       | Miyako              | 3                           | 18.4                    | 176                    | 2.83            | F                | 0                              | 0                       | 0       | 0     |
| 163153 | 05/Sep/2016       | Miyako              | 4                           | 15.1                    | 100                    | 2.90            | U                | 0                              | 0                       | 0       | 0     |
| 163154 | 05/Sep/2016       | Miyako              | U                           | 13.5                    | 68                     | 2.76            | F                | 0                              | 0                       | 0       | 0     |
| 163156 | 26/Oct/2015       | Miyako              | 2                           | 16.9                    | 146                    | 3.02            | F                | 0                              | 0                       | 0       | 0     |
| 163157 | 26/Oct/2015       | Miyako              | 2                           | 16.7                    | 141                    | 3.03            | F                | 0                              | 0                       | 0       | 0     |
| 163158 | 26/Oct/2015       | Miyako              | 1                           | 13.0                    | 61                     | 2.78            | U                | 0                              | 0                       | 0       | 0     |
| 163159 | 26/Oct/2015       | Miyako              | 3                           | 22.6                    | 404                    | 3.50            | F                | 0                              | 0                       | 0       | 0     |
| 163160 | 26/Oct/2015       | Miyako              | 5                           | 24.3                    | 446                    | 3.11            | F                | 0                              | 0                       | 0       | 0     |
| 163161 | 26/Oct/2015       | Miyako              | 4                           | 22.9                    | 341                    | 2.84            | F                | 0                              | 0                       | 0       | 0     |
| 163162 | 26/Oct/2015       | Miyako              | 6                           | 20.8                    | 263                    | 2.92            | F                | 0                              | 0                       | 0       | 0     |
| 163163 | 26/Oct/2015       | Miyako              | 8                           | 21.7                    | 317                    | 3.10            | F                | 0                              | 0                       | 0       | 0     |
| 163164 | 26/Oct/2015       | Miyako              | 3                           | 18.7                    | 187                    | 2.86            | F                | 0                              | 0                       | 0       | 0     |
| 163165 | 26/Oct/2015       | Miyako              | 3                           | 17.8                    | 173                    | 3.07            | F                | 0                              | 0                       | 0       | 0     |
| 163166 | 26/Oct/2015       | Miyako              | 3                           | 17.2                    | 143                    | 2.81            | F                | 0                              | 0                       | 0       | 0     |
|        |                   | Maximum             | 15                          | 33.7                    | 1251                   | 3.64            |                  | 0.088                          | 0.039                   | 0.098   | 0.225 |
|        |                   | Minimum             | 1                           | 13.0                    | 61                     | 2.45            |                  |                                |                         |         |       |
|        |                   | Average             | 5.3                         | 22.8                    | 398                    | 3.03            |                  |                                |                         |         |       |
|        |                   | Median              | 5                           | 22.9                    | 360                    | 3.04            |                  |                                |                         |         |       |
|        |                   | SD                  | 2.7                         | 4.2                     | 218                    | 0.24            |                  |                                |                         |         |       |
|        |                   | RSD                 | 51%                         | 18%                     | 55%                    | 8%              |                  |                                |                         |         |       |

<sup>1</sup> NR: not recorded, <sup>2</sup> the locations of collection areas are shown in Figure 2, <sup>3</sup> U: unidentified, <sup>4</sup> SL: standard length, <sup>5</sup> BW: body weight, <sup>6</sup> CF: condition factor =  $100 \times \text{BW}/\text{SL}^3$ , <sup>7</sup> B: bisexual, F: female, M: male, U: unidentified, <sup>8</sup> 1B: CTX1B, *epi*-deoxy1B: 52-*epi*-54-deoxyCTX1B, deoxy1B: 54-deoxyCTX1B, 0: less than LOD (0.001 µg/kg), 0.001: detected but less than LOQ (0.005 µg/kg).

**Table S2.** LC-MS/MS condition for CTX analysis.

|    |                     |                                                                                              |
|----|---------------------|----------------------------------------------------------------------------------------------|
| LC | Equipment:          | Agilent 1290 Infinity (Agilent Technologies)                                                 |
|    | Column:             | Zorbax Eclipse Plus C18<br>(1.8 $\mu$ m, 2.1 x 50 mm, Agilent Technologies)                  |
|    | Column Temp.:       | 40 $^{\circ}$ C                                                                              |
|    | Injection volume:   | 5 $\mu$ L                                                                                    |
|    | Eluent A:           | 5 mM ammonium formate in 0.1% formic acid                                                    |
|    | Eluent B:           | methanol                                                                                     |
|    | Flow rate:          | 0.4 mL/min                                                                                   |
|    | Gradient condition: | 0 min (60%B)–0.25 min (60%B)–0.5 min (75%B)–<br>12 min (90%B)–14 min (90%B)–14.1 min (100%B) |
| MS | Equipment:          | 6460 Triple Quad LC/MS (Agilent Technologies)                                                |
|    | Ionization:         | ESI with Agilent Jet Stream                                                                  |
|    | Nebulizer gas:      | N <sub>2</sub> , 50 psi                                                                      |
|    | Sheath gas:         | N <sub>2</sub> , 380 $^{\circ}$ C, 11 L/min                                                  |
|    | Dry gas:            | 300 $^{\circ}$ C, 10 L/min                                                                   |
|    | Capillary voltage:  | 5000 V                                                                                       |
|    | Fragmentor voltage: | 300 V                                                                                        |
|    | Collision energy:   | 40 eV                                                                                        |
|    | Monitor ions:       | [M+Na] <sup>+</sup> > [M+Na] <sup>+</sup>                                                    |
|    |                     | <i>m/z</i> 1045.6: CTX3C and 49- <i>epi</i> CTX3C                                            |
|    |                     | <i>m/z</i> 1061.6: 2-hydroxyCTX3C and 51-hydroxyCTX3C                                        |
|    |                     | <i>m/z</i> 1079.6: 2,3-dihydroxyCTX3C                                                        |
|    |                     | <i>m/z</i> 1083.6: CTX4A and CTX4B                                                           |
|    |                     | <i>m/z</i> 1095.6: 2,3,51-trihydroxyCTX3C                                                    |
|    |                     | <i>m/z</i> 1117.6: 52- <i>epi</i> -54-deoxyCTX1B and 54-deoxyCTX1B                           |
|    |                     | <i>m/z</i> 1133.5: CTX1B                                                                     |

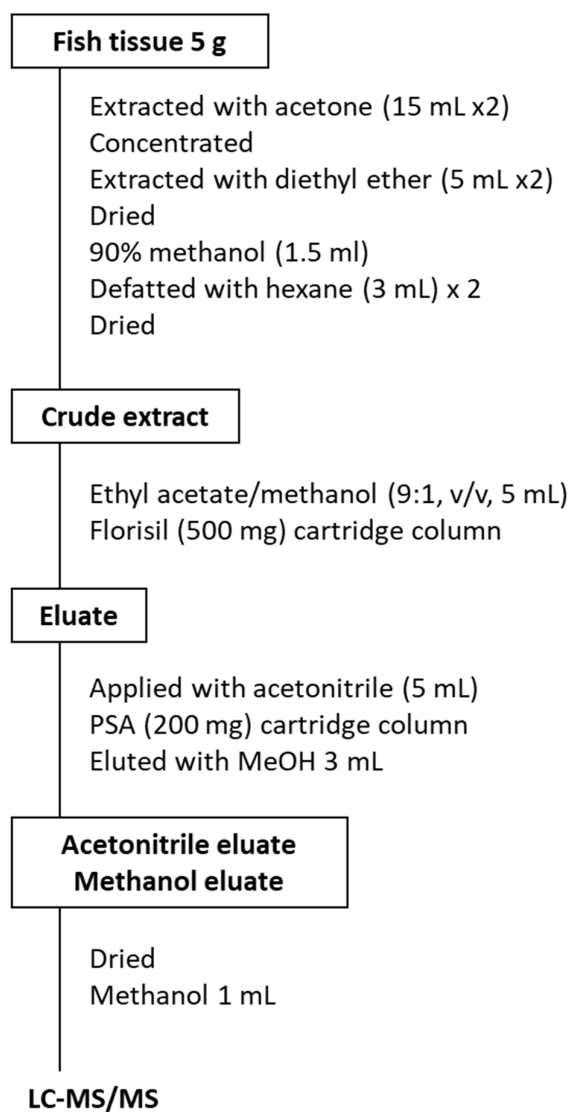

**Figure S1.** Sample preparation from flesh for LS-MS/MS.
